# Supplementary material
Source: PubMed Central journal article supplement (PMC8820190)
Supplement: NEJMcp2117115_appendix.pdf [file NEJMcp2117115_appendix.pdf]

## Supplementary Appendix

Supplement to: Drain PK. Rapid diagnostic testing for SARS-CoV-2. N Engl J Med. DOI: 10.1056/NEJMcp2117115

This appendix has been provided by the author to give readers additional information about the work.

**APPENDIX for Rapid Diagnostic Testing for SARS-CoV-2**

Paul K. Drain, M.D., M.P.H.

**Table of Contents**

**Table S1. Rapid diagnostic tests with FDA EUA status for home-based use and settings with CLIA certificate of waiver for SARS-CoV-2**

**Table S1. Rapid diagnostic tests with FDA EUA status for home-based use and settings with CLIA certificate of waiver for SARS-CoV-2.**

| Test Name; Manufacturer <sup>1</sup>                                              | Target Analyte; Test Method           | Specimen            | Time to Result (minutes) | Lower Age Limit for Home Use (years) | Indication for Use (symptomatic; asymptomatic)                                   | Accuracy <sup>2</sup> (PPA; NPA) |
|-----------------------------------------------------------------------------------|---------------------------------------|---------------------|--------------------------|--------------------------------------|----------------------------------------------------------------------------------|----------------------------------|
| <b>Tests for home-based use</b>                                                   |                                       |                     |                          |                                      |                                                                                  |                                  |
| InteliSwab COVID-19 Rapid Test; OraSure Technologies                              | Antigen (nucleocapsid); LFA           | Anterior nares      | 30-40                    | 15                                   | Symptomatic - within 7 days of onset<br>Asymptomatic - test twice over 2-3 days  | 84%; 98%                         |
| Celltrion DiaTrust COVID-19 Ag Test; Celltrion USA                                | Antigen (nucleocapsid and RBD); LFA   | Mid-turbinate nasal | 15-20                    | 14                                   | Symptomatic - within 7 days of onset;<br>Asymptomatic - test twice over 2-3 days | 86.7%; 99.8%                     |
| QuickVue At-Home OTC COVID-19 Test; Quidel Corporation                            | Antigen (nucleocapsid); LFA           | Anterior nares      | 10-15                    | 2                                    | Symptomatic - within 6 days of onset;<br>Asymptomatic - test twice over 2-3 days | 83.5%; 99.2%                     |
| Flowflex COVID-19 Antigen Home Test; Acon Laboratories                            | Antigen (nucleocapsid); LFA           | Anterior nares      | 15-30                    | 2                                    | Symptomatic - within 7 days of onset or<br>Asymptomatic (without serial testing) | 93%; 100%                        |
| BD Veritor At-Home COVID-19 Test; Becton, Dickinson and Company                   | Antigen (nucleocapsid); LFA           | Anterior nares      | 15-20                    | 2                                    | Symptomatic - within 7 days of onset;<br>Asymptomatic - test twice over 2-3 days | 84.6%; 99.8%                     |
| CareStart COVID-19 Antigen Home Test; Access Bio                                  | Antigen (nucleocapsid); LFA           | Anterior nares      | 10-15                    | 2                                    | Symptomatic - within 7 days of onset;<br>Asymptomatic - test twice over 2-3 days | 86.7%; 97.5%                     |
| BinaxNOW COVID-19 Antigen Self Test <sup>3</sup> ; Abbott Diagnostics Scarborough | Antigen (nucleocapsid); LFA           | Anterior nares      | 15-30                    | 2                                    | Symptomatic - within 7 days of onset;<br>Asymptomatic - test twice over 2-3 days | 91.7%; 100%                      |
| Ellume COVID-19 Home Test <sup>4</sup> ; Ellume Limited                           | Antigen (nucleocapsid); LFA           | Mid-turbinate nasal | 15                       | 2                                    | Symptomatic - within 5 days of onset<br>Asymptomatic (without serial testing)    | 96%; 100%                        |
| iHealth Covid 19 Antigen Rapid test; iHealth Labs                                 | Antigen (nucleocapsid); LFA           | Anterior nares      | 15                       | 2                                    | Symptomatic - within 7 days of onset;<br>Asymptomatic - test twice over 2-3 days | 94.3%; 98.1%                     |
| SCoV-2 Ag Detect Rapid Test; InBios International                                 | Antigen (nucleocapsid); LFA           | Anterior nares      | 20-25                    | 2                                    | Symptomatic - within 5 days of onset;<br>Asymptomatic - test twice over 2-3 days | 86.6%; 100%                      |
| Detect Covid-19 Test; Detect                                                      | Molecular (ORF 1ab gene); RT LAMP     | Anterior nares      | 55                       | 2                                    | Symptomatic<br>Asymptomatic - test twice over 2-3 days                           | 90.9%; 97.5%                     |
| Lucira CHECK-IT COVID-19 Test Kit; Lucira Health                                  | Molecular (N gene); RT LAMP           | Anterior nares      | 30                       | 2                                    | Symptomatic<br>Asymptomatic (without serial testing)                             | 92%; 98%                         |
| Cue COVID-19 Test; Cue Health                                                     | Molecular (N gene); RT isothermal PCR | Anterior nares      | 20                       | 2                                    | Symptomatic<br>Asymptomatic (without serial testing)                             | 96.4%; 98.2%                     |
| <b>Tests for use in Settings with CLIA Certificate of Waiver</b>                  |                                       |                     |                          |                                      |                                                                                  |                                  |

|                                                                      |                                          |                                             |       |     |                                                                                  |              |
|----------------------------------------------------------------------|------------------------------------------|---------------------------------------------|-------|-----|----------------------------------------------------------------------------------|--------------|
| NIDS COVID-19 Antigen Rapid Test Kit; ANP Technologies               | Antigen (nucleocapsid); LFA              | Mid-turbinate nasal                         | 15-30 | N/A | Symptomatic - within 7 days of onset;<br>Asymptomatic - test twice over 2-3 days | 95.1%; 97.0% |
| LumiraDx SARS-CoV-2 Ag Test; LumiraDx UK                             | Antigen (nucleocapsid); Microfluidic IFA | Anterior nares or NP                        | 12    | N/A | Symptomatic - within 12 days of onset;<br>Asymptomatic (without serial testing)  | 97.6%; 96.6% |
| Clip COVID Rapid Antigen Test; Luminostics (now Clip Diagnostics)    | Antigen (nucleocapsid); Lateral flow IFA | Anterior nares                              | 30    | N/A | Symptomatic - within 5 days of onset                                             | 96.9%; 100%  |
| Status COVID-19/Flu A&B; Princeton BioMeditech Corp                  | Antigen (nucleocapsid); LFA              | Anterior nares or NP                        | 15-20 | N/A | Symptomatic - within 5 days of onset                                             | 93.1%; 100%  |
| Sienna-Clarity COVID-19 Antigen Rapid Test Cassette; Salofa Oy       | Antigen (nucleocapsid); LFA              | NP                                          | 10-20 | N/A | Symptomatic - within 6 days of onset                                             | 87.5%; 98.9% |
| GenBody COVID-19 Ag; GenBody                                         | Antigen (nucleocapsid); LFA              | Anterior nares or NP                        | 15-20 | N/A | Symptomatic - within 6 days of onset;<br>Asymptomatic - test twice over 2-3 days | 92.3%; 99.0% |
| INDICAID COVID-19 Rapid Antigen Test; PHASE Scientific International | Antigen (nucleocapsid); LFA              | Anterior nares                              | 20-25 | N/A | Symptomatic - within 5 days of onset;<br>Asymptomatic - test twice over 2-3 days | 88.9%; 96.8% |
| SPERA COVID-19 Ag Test; Xtrava Health                                | Antigen (nucleocapsid); LFA              | Anterior nares                              | 15-30 | N/A | Symptomatic - within 5 days of onset                                             | 91.8%; 96.9% |
| Xpert Xpress CoV-2/Flu/RSV plus; Cepheid                             | Molecular (N and E genes); RT-PCR        | Anterior nares or NP                        | 25    | N/A | Symptomatic                                                                      | 100%; 100%   |
| Accula SARS-CoV-2 Test; Mesa Biotech                                 | Molecular (N gene); RT-PCR               | Anterior nares or mid-turbinate nasal       | 30-60 | N/A | Symptomatic                                                                      | 95.8%; 100%  |
| ID NOW COVID-19; Abbott Diagnostics Scarborough                      | Molecular (RdRp gene); NEAA              | Anterior nares or NP                        | 13    | N/A | Symptomatic - within 7 days of onset                                             | 94.7%; 98.6% |
| cobas SARS-CoV-2 for Liat System; Roche Molecular Systems            | Molecular (N and ORF 1ab genes); RT-PCR  | Anterior nares or mid-turbinate nasal or NP | 20    | N/A | Symptomatic<br>Asymptomatic (without serial testing)                             | 96.1%; 96.8% |
| BioFire Respiratory Panel 2.1-EZ; BioFire Diagnostics                | Molecular (S and M genes); RT-PCR        | NP                                          | 45    | N/A | Symptomatic                                                                      | 98.4%; 98.9% |
| Visby Medical COVID-19 Point of Care Test; Visby Medical             | Molecular (N1 gene); RT-PCR cartridge    | Anterior nares or mid-turbinate nasal or NP | 30    | N/A | Symptomatic                                                                      | 100%; 95.3%  |
| Talis One Covid-19 Test system; Talis Biomedical Corporation         | Molecular (ORF 1ab and N genes); RT-PCR  | Mid-turbinate nasal                         | 30    | N/A | Symptomatic                                                                      | 95.7%; 100%  |

EUA=Emergency Use Authorization; FDA=US Food and Drug Administration; IFA=immuno-fluorescence assay; LFA=lateral flow assay; M=membrane protein; N=nucleocapsid; NEAA=nicking enzyme assisted amplification; NP=nasopharyngeal; NPA=negative percent agreement; ORF=open reading frames; PCR=polymerase chain reaction; PPA=positive percent agreement; RBD=Receptor Binding Domains; RdRp=RNA dependent RNA polymerase; RT=reverse transcription; S=spike protein.

1. All RDTs approved for home-based use, except iHealth Covid 19 Antigen Rapid test by iHealth Labs, have also received approval for use in patient care settings operating under a CLIA Certificate of Waiver. Companies with a similar product approved for ‘home-based use’ were not listed again for the ‘use in settings with a CLIA certificate of waiver’ section. Each company was listed once in this table, except Abbott Diagnostics Scarborough, which has two different RDTs. The EUAs will remain in effect for the duration of the COVID-19 declaration justifying emergency use of in vitro diagnostics, unless revoked by FDA. To date, no RDTs have obtained full FDA approval.
2. All data presented on test accuracy were obtained from the FDA approval listing or a company website.<sup>27</sup> The accuracy of each test may be different in clinical practice and real-world settings.
3. A version of the BinaxNOW test is available and approved for CLIA-waived settings.
4. Ellume has issued a limited recall for RDTs with certain manufacturing lot numbers.
